# Supplementary material for: Atg4 proteolytic activity can be inhibited by Atg1 phosphorylation
Source: PubMed Central journal article supplement (PMC5562703; doi:10.1038/s41467-017-00302-3), 2017-08-18
Supplement: 41467_2017_302_MOESM4_ESM.pdf [file 41467_2017_302_MOESM4_ESM.pdf]

## **Description of Supplementary Files**

Title: Supplementary Information

Description: Supplementary Figures, Supplementary Tables, and Supplementary References

Title: Supplementary Movie 1

Description: Time-lapse imaging of GFP-Atg8.R puncta in Atg4 expressing cells.

The RGY306 strain was grown in YPD medium at 30°C to a logarithmic phase before being nitrogen starved in SD-N medium for 30 min. Cells were also incubated with CMAC dye 10 min before image acquisition to visualize the vacuoles. The video were generated as described in the Methods section.

Title: Supplementary Movie 2

Description: Time-lapse imaging of GFP-Atg8.R puncta in Atg4S307A expressing cells.

The RGY297 strain was grown and imaged as in Supplementary Video 1.

Title: Supplementary Movie 3

Description: Time-lapse imaging of GFP-Atg8.R puncta in Atg4S307D expressing cells.

The RGY298 strain was grown and imaged as in Supplementary Video 1.

**a**

```
1 MQRWLQLWKM DLVQKVSHGV FEGSSEEPAA LMNHDIIVLG EVYPERDEES
51 GAEQCEQDCR YRGEAVSDGF LSSLFGREIS SYTKEFLLDV QSRVNFTYRT
101 RFVPIARAPD GPSPLSLNLL VRTNPISTIE DYIANPDCFN TDIGWGCMIR
151 TGQSLLGNAL QILHLGRDFR VNGNESLERE SKFVNWFNDT PEAPFSLHNF
201 VSAGTELSDK RPEWFGPAA TARSIQSLIY GFPECGIDDC IVSVSSGDIY
251 ENEVEKVFAE NPNSRILFLL GVKLGINAVN ESYRESICGI LSSTQSVGIA
301 GGRPSSSLYF FGYQGNEFLH FDPHIPQPAV EDSFVESCHT SKFGKLQLSE
351 MDP SMLIGIL IKGEKDWQQW KLEVAESAII NVLAKRMDDF DVSCSMDDVE
401 VSSNSMKKDA SNNENLGVLE GDYVDIGAIF PHTTNTEDVD EYDCFQDIHC
451 KKQKIVVMGN THTVNANLTD YEVEGVLVEK ETVGIHSPID EKC
```

**b**

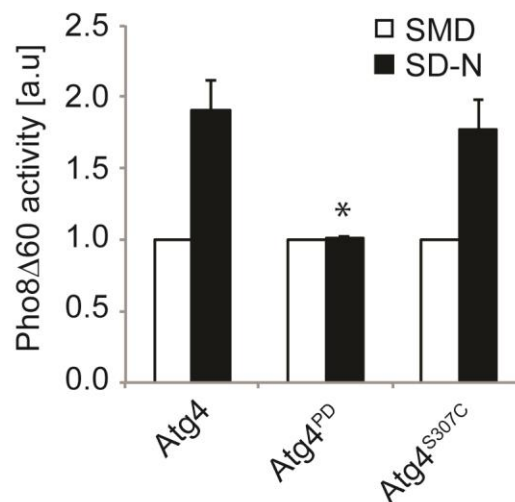

**Supplementary Figure 1. Atg4 and amino acid sequence.** (a) Atg4 contains 7 potential Atg1 phosphorylation sites. *Saccharomyces cerevisiae* Atg4 amino acid sequence. The potential phospho-acceptor serines in the Atg1 potential phosphorylation sites are in blue, S307 is in green and the residues that are putatively part of the catalytic site are in red. (b) The *atg4Δ* (SAY130) strain carrying a plasmid expressing Atg4, Atg4<sup>PD</sup> or Atg4<sup>S307C</sup> was grown in

SMD or nitrogen starved (SD-N) for 3 h before measuring Pho8Δ60 activity in cell lysates. Pho8Δ60 activity was expressed in a.u. stands for arbitrary units and relative to the control SMD conditions. Error bars represent the SD of 5 independent experiments. The symbol \* indicate statistical significance ( $p < 0.001$ ) with the cells carrying Atg4 and was calculated with the paired two-tailed Student's *t*'test.

**a**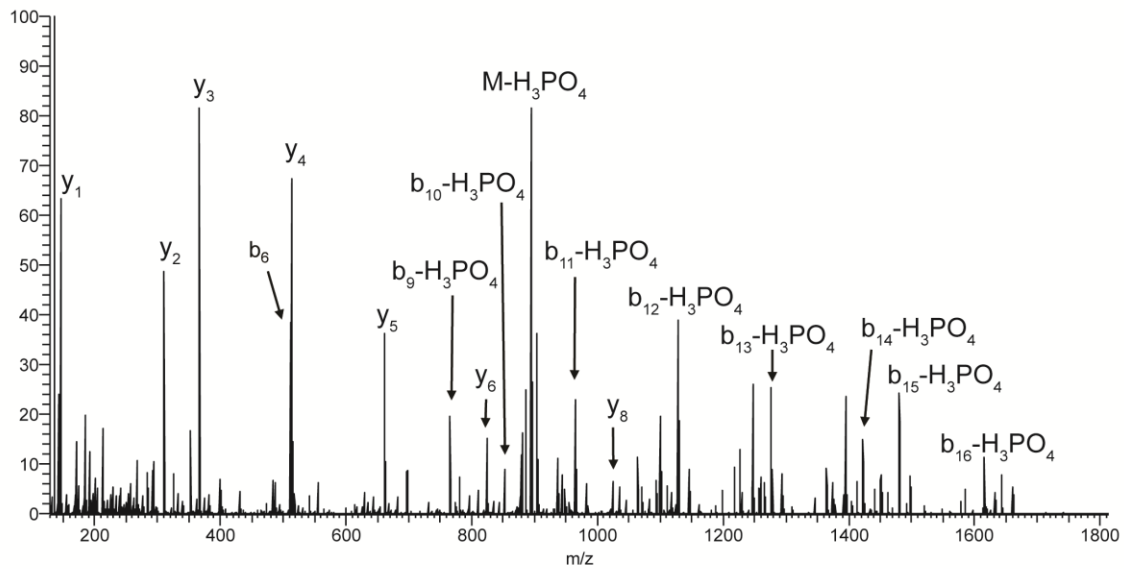**b**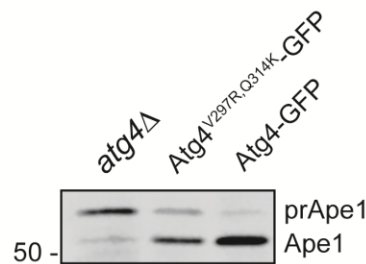

**Supplementary Figure 2. Atg4 phosphorylation analysis in vivo.** (a) Atg4V297R,Q314K-GFP was purified and processed for protein mass spectrometry as described in Methods. Extracted ion chromatogram of the phosphorylated GIAGGRPSSSLYFFGYK peptide is presented. Proposed structures of the fragment ions are indicated with numbered letter. The detailed data are in Supplementary Table 2. (b) Normal progression of autophagy in cells overexpressing Atg4<sup>V297R,Q314K</sup>-GFP was assessed by monitoring maturation of precursor Ape1 (prApe1) into Ape1 by western blot. The *atg4Δ* strain transformed with an empty vector (pRS416, *atg4Δ*), pTEFATG4-GFP(416) or pTEFAtg4V297R,Q314K-GFP(416), was grown to an exponential phase before precipitating proteins with trichloroacetic acid and separate them by SDS-PAGE. Western blot membranes were probed with anti-Ape1 antibodies.

**a**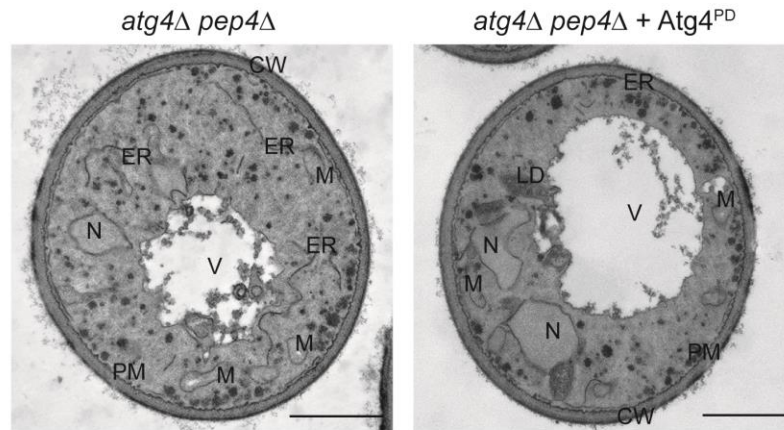**b**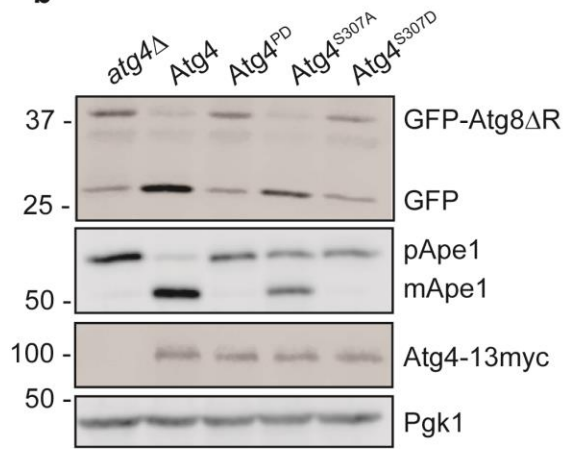**c**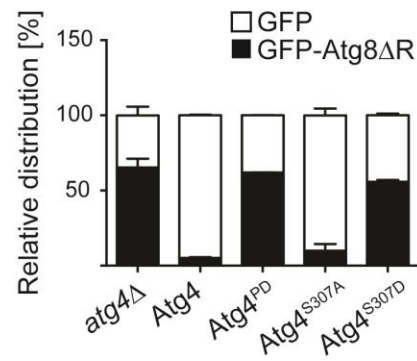**d**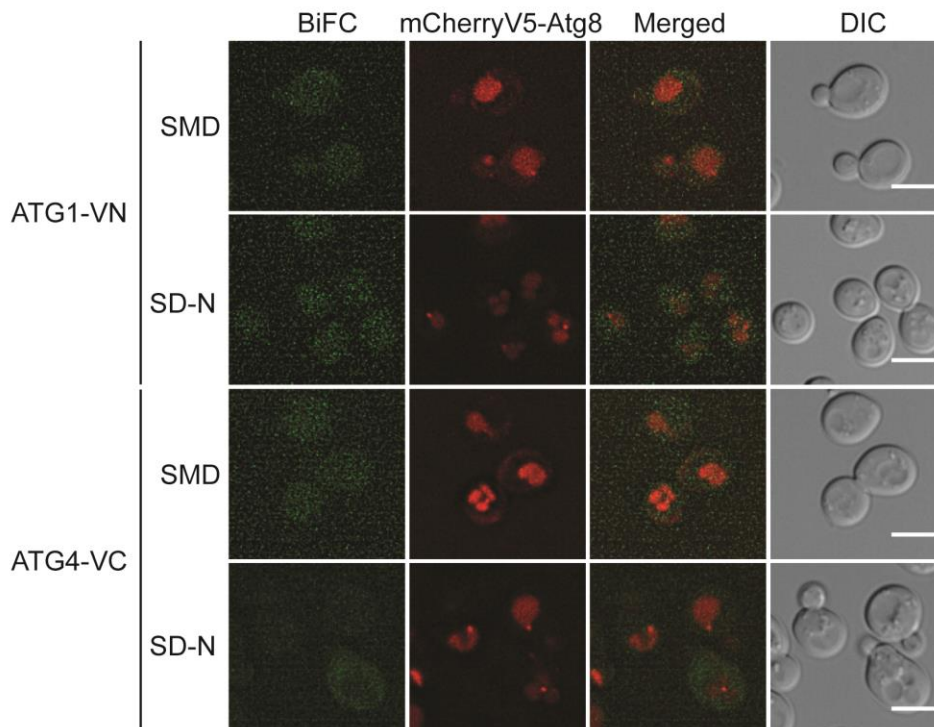

**Supplementary Figure 3. Control experiments for electron microscopy, GFP-Atg8ΔR distribution analyses and BiFC assay.** (a) The *atg4Δ pep4Δ* strain transformed with an empty plasmid (JSY163) or expressing Atg4<sup>PD</sup>-GFP (SAY145) was processed for electron microscopy as in Fig. 1d. CW, cell wall; ER, endoplasmic reticulum; LD, Lipid droplet; M, mitochondrion; N, nucleus; PM, plasma membrane; V, vacuole. Scale bar, 1 μm. (b) TCA-precipitated proteins from the cells analyzed in Fig. 2b were examined by western blot. (c) Quantification of the amounts of GFP-Atg8ΔR and GFP in the western blot shown in (b). Error bars represent the SD of 3 independent experiments. (d) Control experiments for the BiFC assay. WT cells expressing endogenous Atg1-VN (JSY181) or Atg4-VC (JSY184) and carrying the pCumCherryV5ATG8(416) plasmid were processed as in Fig. 4a. DIC, differential interference contrast. Scale bar, 5 μm.

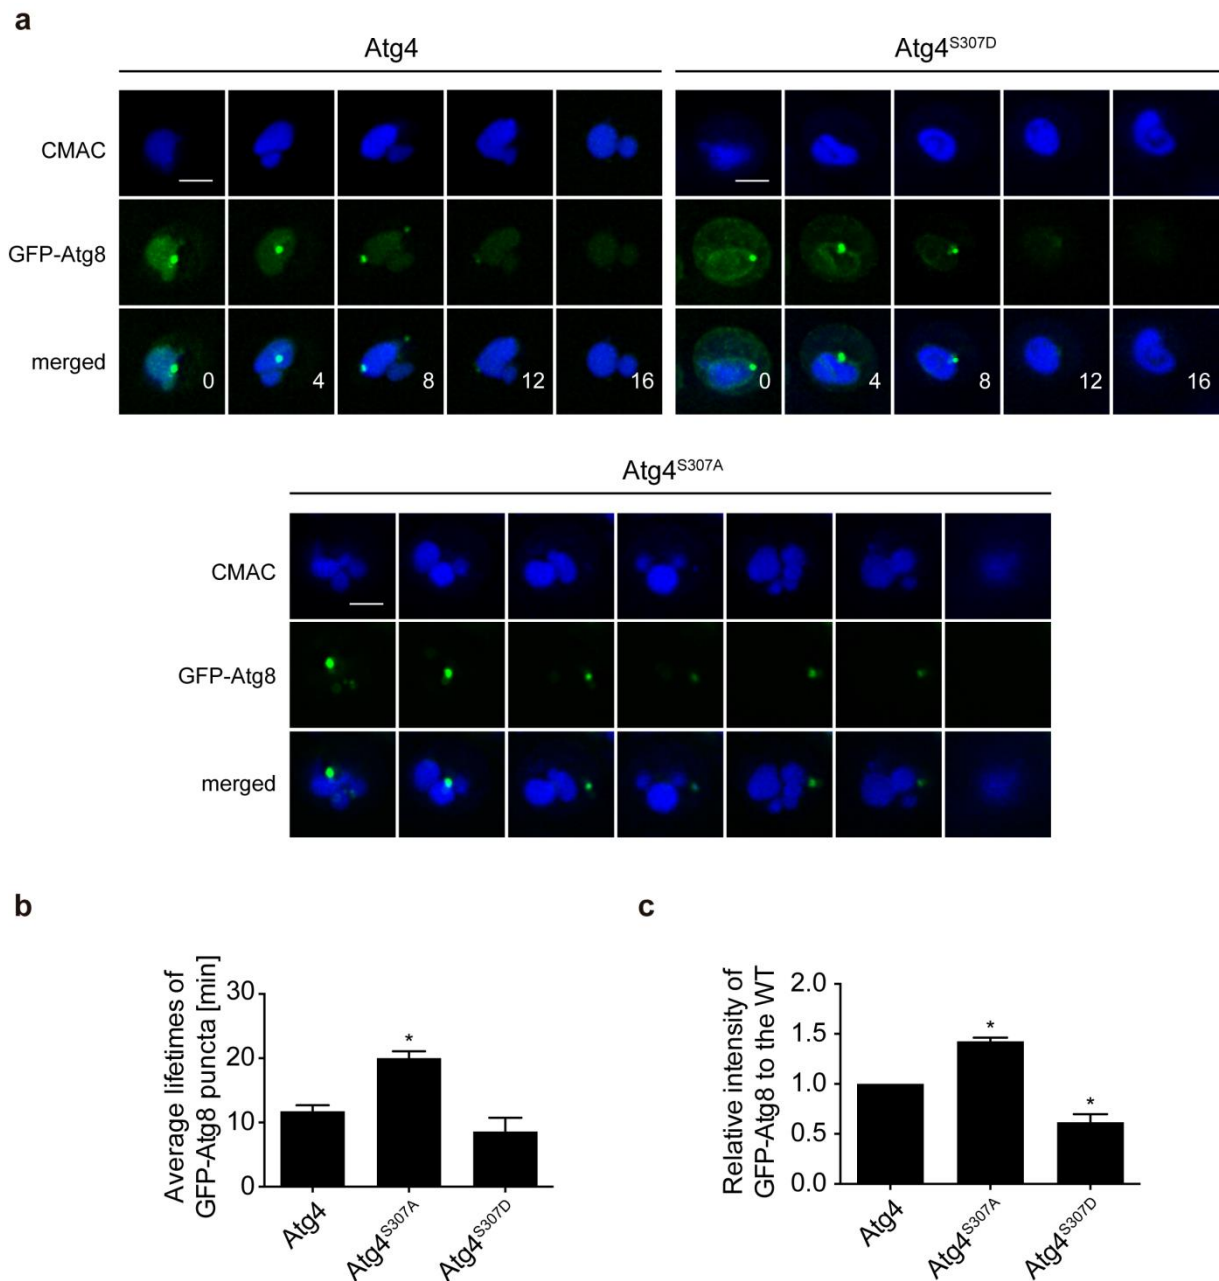

**Supplementary Figure 4. Time-lapse imaging of GFP-Atg8DR-positive autophagosomes in presence of Atg4, Atg4<sup>S307D</sup> and Atg4<sup>S307A</sup>.** (a) Cells expressing GFP-Atg8ΔR and Atg4 (RGS306), Atg4<sup>S307D</sup> (RSY298) or Atg4<sup>S307A</sup> (RGS297) were grown in YPD medium at 30°C to a logarithmic phase before being after nitrogen starved in SD-N medium for 30 min. Cells were also incubated with the CMAC dye to label the vacuole, 10 min before being analysed by live-cell imaging as described in Methods with picture collected every 30 s. A representative event for each strain is shown in Supplementary Movies 1, 2 and 3. The single

focal plane frames from these videos collected at the intervals of 4 min, are shown in the panel. Scale bar: 2  $\mu$ m. (b) Quantification of GFP-Atg8 $\Delta$ R-positive puncta lifetimes imaged in (a). Autophagosome formation time was defined and measured from the appearance until disappearance of GFP-Atg8 $\Delta$ R punctum over-time. Error bars indicate the SD of three independent experiments and in each experiment, 25 cells where the PAS was monitored continuously in the same confocal planes were analyzed. Significant differences ( $p < 0.01$ ) between the various Atg4 mutants and the WT are indicated with the symbol \*. (c) Fluorescence intensity quantification of GFP-Atg8 $\Delta$ R punctate structures in the strains examined in (a). The average intensity of cells expressing WT Atg4 was set to 1 as relative reference. Error bars indicate the SD of three independent experiments. Significant differences ( $p < 0.01$ ) between the various Atg4 mutants and the WT are indicated with the symbol \* and were calculated with the paired two-tailed Student's *t*'test.



**a**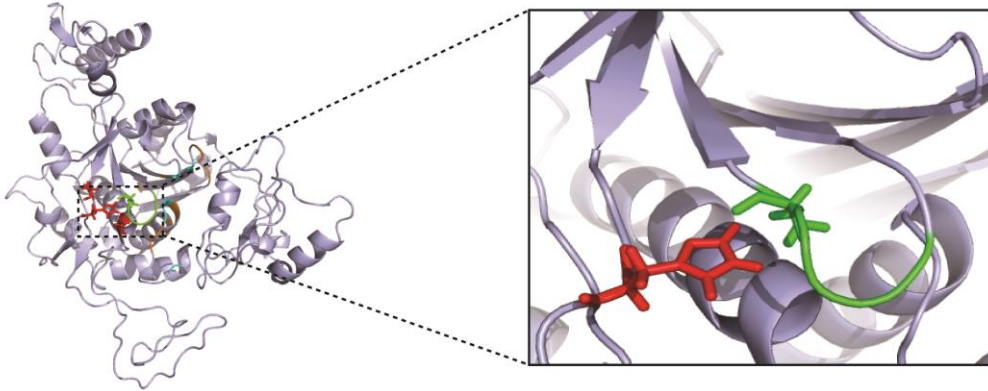**b**

|            |             |   |              |     |
|------------|-------------|---|--------------|-----|
| CaATG4:    | YSCGIAGGKPS | S | FYFLGYEDTDL  | 310 |
| ScAtg4:    | QSVGIAGGRPS | A | SHYFVAVQGSHF | 298 |
| KIAtg4:    | QSVGIAGGRPS | S | LYFFGYQGNEF  | 318 |
| AnAtg4:    | YSVGIAGGKPS | S | LYFFGYQNENL  | 293 |
| CeAtg4.2:  | SCLGITGGRPD | H | SSWVFGYYGDQI | 390 |
| MmATG4C:   | YCVGIIGGKPK | Q | SYYFAGFQDDSL | 341 |
| HsATG4C:   | YCVGIIGGKPK | Q | SYYFAGFQDDSL | 341 |
| MmATG4D:   | LCLGIMGGKPR | H | SLYFIGYQDDFL | 352 |
| HsATG4D:   | LCLGIMGGKPR | H | SLYFIGYQDDFL | 352 |
| CeAtg4.1a: | QCVGIIGGRPN | H | ALYFVGMSGSKL | 282 |
| CeAtg4.1b: | QCVGIIGGRPN | H | ALYFVGMSGSKL | 309 |
| DmAtg4:    | SSCGMIGGRPN | Q | ALYFLGYVDDEV | 267 |
| MmATG4A:   | QSLGALGGKPN | N | AYYFIGFLGDEL | 272 |
| HsATG4A:   | QSLGALGGKPN | N | AYYFIGFLGDEL | 275 |
| DrATG4B:   | QSLGVIGGKPN | S | AHYFIGFVGDEL | 276 |
| MmATG4B:   | QSLGVIGGKPN | S | AHYFIGYVGEEL | 274 |
| HsATG4B:   | QSLGVIGGKPN | S | AHYFIGYVGEEL | 274 |

**c**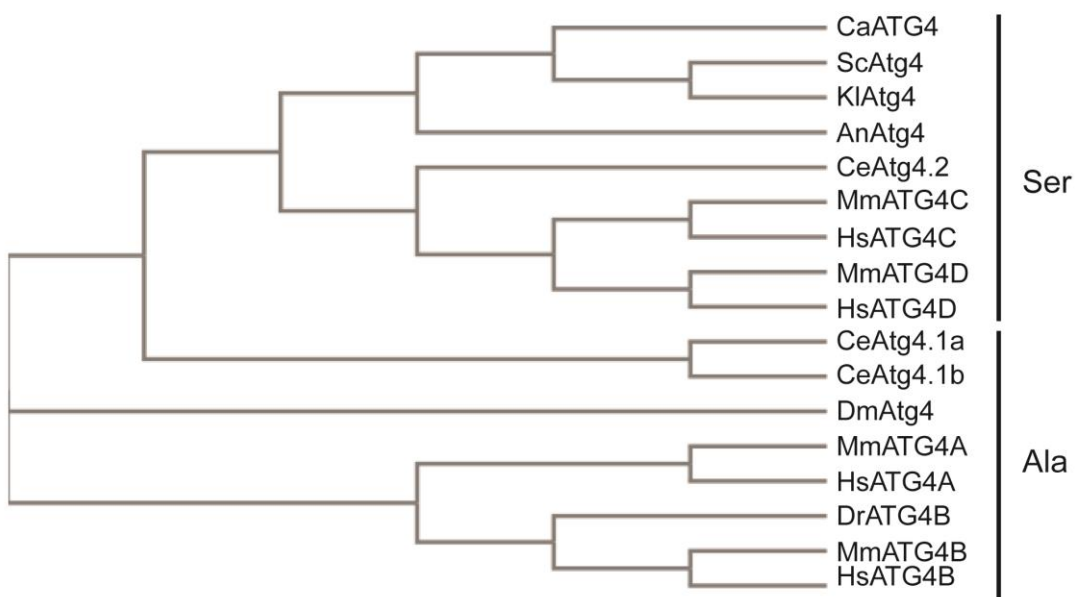

**Supplementary Figure 5. Predicted three-dimensional model of yeast Atg4 structure and conservation of S307 among eukaryotes.** (a) Three-dimensional model predicting yeast Atg4 structure generated from the crystal structure of human ATG4B using the software at <http://robeta.bakerlab.org/> (left) and an enlargement of the inset highlighting the region around S307 (right). The putative catalytic site (C147, D322 and H324) of Atg4 is highlighted in red. The putative regulatory loop is colored in green and conserved residues forming part of the predicted Atg8 interaction region are in light blue and orange. (b) Alignment of multiple amino acid sequences of Atg4 from different species was performed using the Clustal Omega software (<http://www.ebi.ac.uk/Tools/msa/clustalo/>). The residues in the equivalent position to the S307 of yeast Atg4 are highlighted by a red square. UniprotKB accession numbers are: *C. albicans* Atg4 (Q59UG3), *A. nidulans* Atg4 (Q5B7L0), *S. cerevisiae* Atg4 (P53867), *K. lactis* Atg4 (Q6CQ60), *C. elegans* Atg4.1a (Q9N30), *C. elegans* Atg4.1b (K8ESC5), *C. elegans* Atg4.2 (Q9U1N6), *D. melanogaster* Atg4 (M9PBM3), *D. rerio* Atg4B (Q6DG88), *M. musculus* ATG4A (Q8C9S8), *M. musculus* ATG4B (Q8BGE6), *M. musculus* ATG4C (Q811C2), *M. musculus* ATG4D (Q8BGV9), *H. sapiens* ATG4A (Q8WYN0), *H. sapiens* ATG4B (Q9Y4P1), *H. sapiens* ATG4C (Q96DT6) and *H. sapiens* ATG4D (Q86TL0). (c) Cladogram showing the phylogenetic relation among the Atg4 proteins from different eukaryotes obtained using the Clustal Omega software (<http://www.ebi.ac.uk/Tools/msa/clustalo/>). On the right of the figure it is indicated which Atg4 homologues have a serine (Ser) or an alanine (Ala) residue in the equivalent position to the S307 of yeast Atg4.

**a**

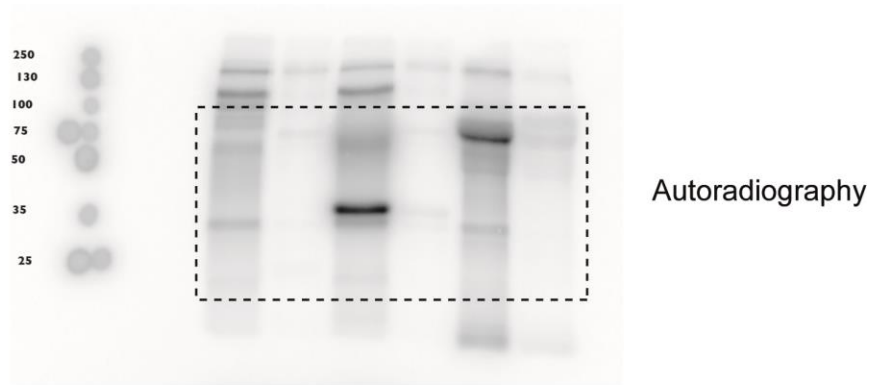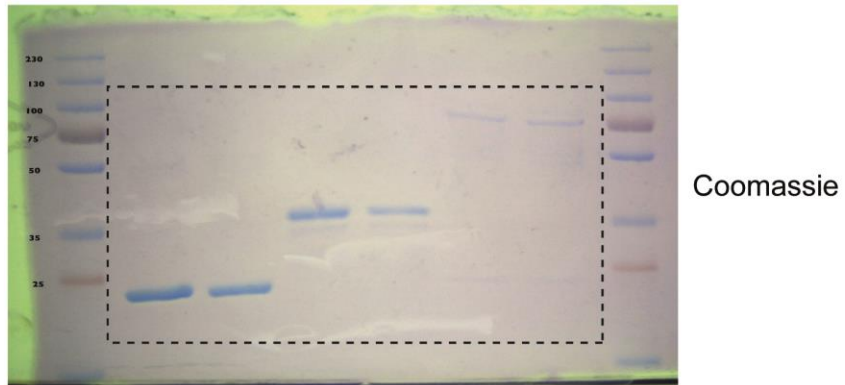

**b**

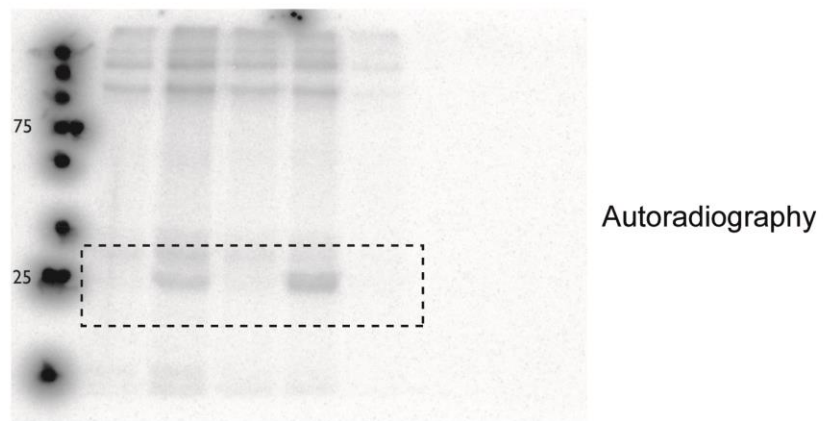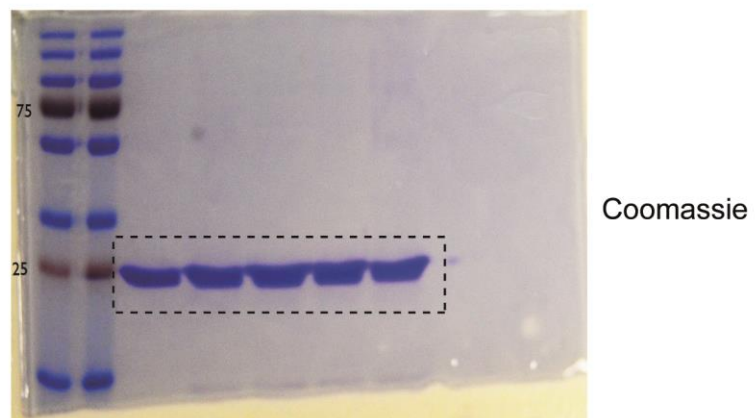

**Supplementary Figure 6. Original material.** (a) Autoradiography and scan used to generate Figure 1a. (b) Autoradiography and scan used to generate Figure 1c.

**a**

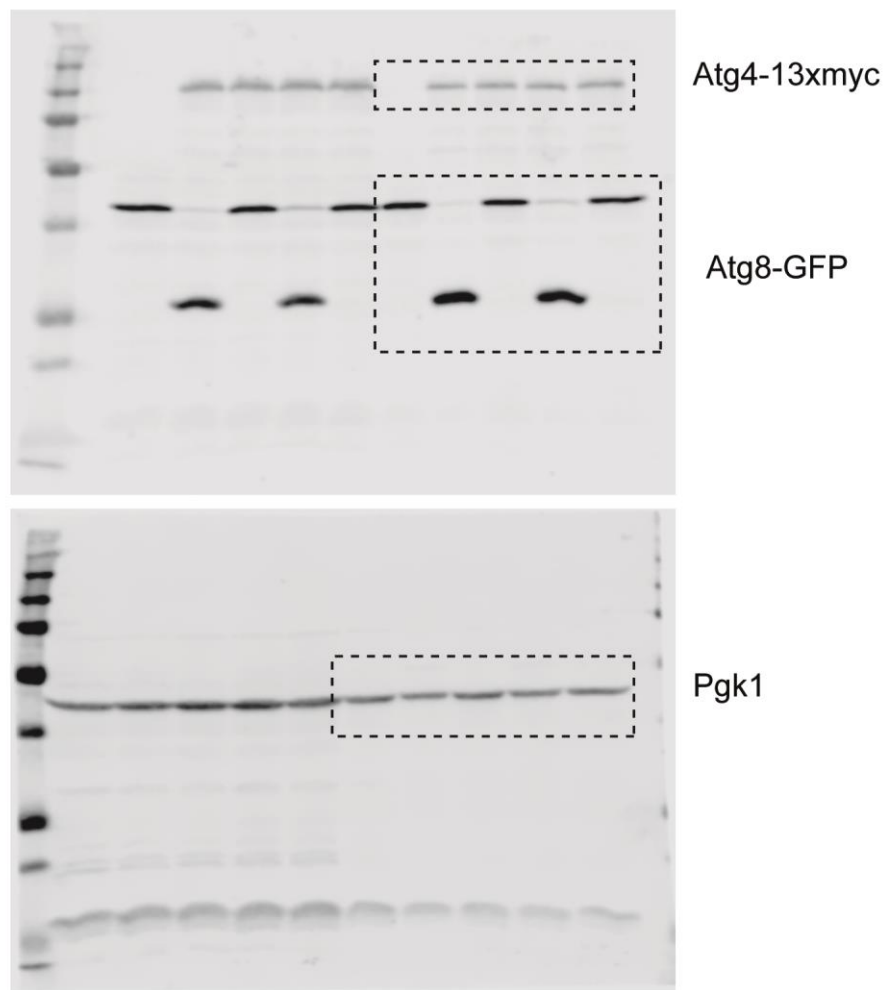

**b**

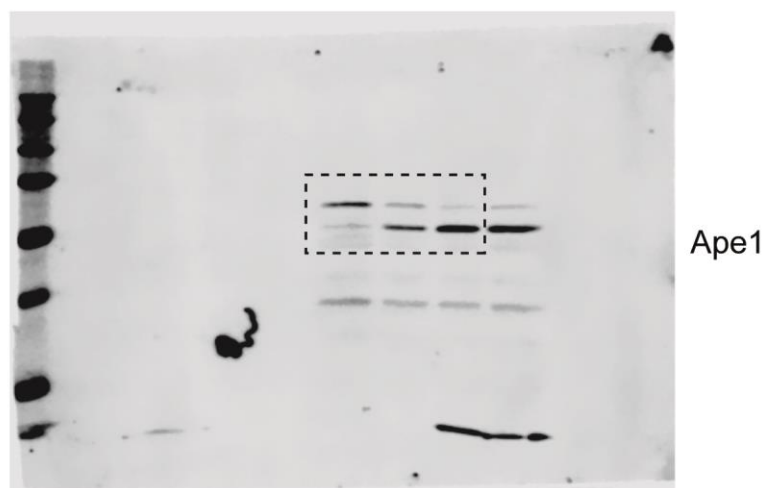

**Supplementary Figure 7. Original material.** (a) Scans of the western blots used to generate Figure 2a. (b) Scan of the western blots used to generate Supplementary Figure 2b.

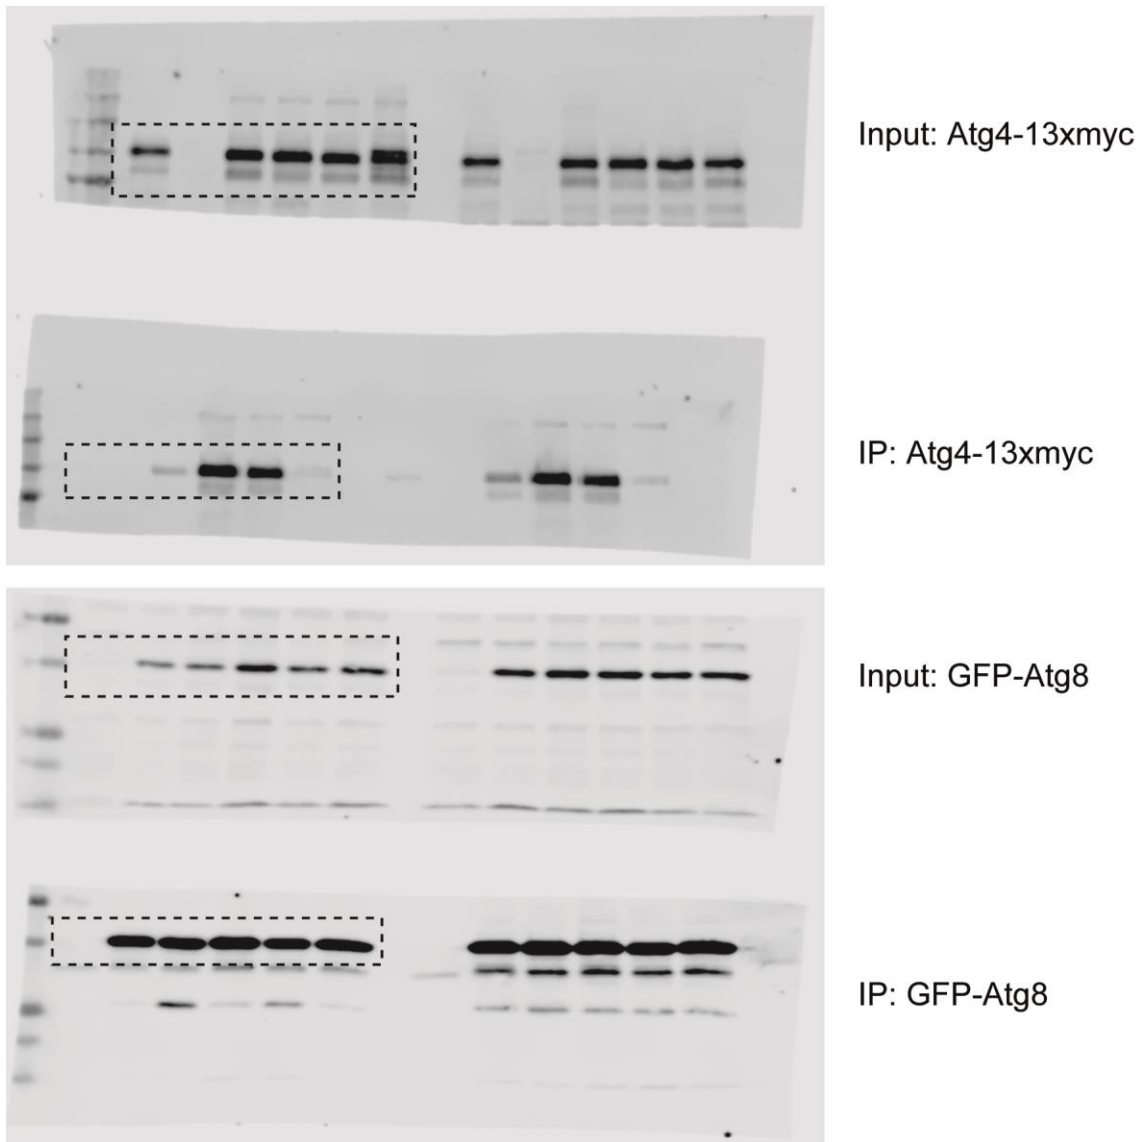

**Supplementary Figure 8. Original material.** Scans of the western blots used to generate Figure 3b.

**Supplementary Table 1. Yeast strains used in this work**

| <b>Name</b> | <b>Genotype</b>                                                                                           | <b>Origin</b> |
|-------------|-----------------------------------------------------------------------------------------------------------|---------------|
| JSY151      | SEY6210 <i>atg4Δ::TRP1 CUP1pr-GFP-ATG8ΔR::LEU2</i>                                                        | This study    |
| JSY163      | SEY6210 <i>atg4Δ::TRP1 pep4Δ::LEU2 pRS::URA3</i>                                                          | This study    |
| JSY164      | SEY6210 <i>atg4Δ::TRP1 pep4Δ::LEU2 ATG4<sup>S307A</sup>-GFP::URA3</i>                                     | This study    |
| JSY165      | SEY6210 <i>atg4Δ::TRP1 pep4Δ::LEU2 ATG4<sup>S307D</sup>-GFP::URA3</i>                                     | This study    |
| JSY181      | SEY6210 <i>ATG1-VN::HIS3</i>                                                                              | This study    |
| JSY184      | SEY6210 <i>ATG4-VC::TRP1</i>                                                                              | This study    |
| JSY185      | SEY6210 <i>ATG1-VN::HIS3 ATG4-VC::TRP1</i>                                                                | This study    |
| JSY190      | SEY6210 <i>atg2Δ::hphNTI ATG1-VN::HIS3 ATG4-VC::TRP1</i>                                                  | This study    |
| JSY215      | SEY6210 <i>atg2Δ::hphNTI atg13::LEU2 ATG1-VN::HIS3<br/>ATG4-VC::TRP1</i>                                  | This study    |
| MNY006      | SEY6210 <i>ATG4-GFP::TRP1</i>                                                                             | This study    |
| PJ69-4A     | MATa <i>leu2-3,112 trp1-901 ura3-52 his3-200 gal4 gal80<br/>LYS2::GAL1-HIS3 GAL2-ADE2 met2::GAL7-lacZ</i> | <sup>1</sup>  |
| RGS297      | SEY6210 <i>atg4Δ::TRP1 CUP1pr-GFP-ATG8ΔR::LEU2<br/>pATG4<sup>S307A</sup>::URA3</i>                        | This study    |
| RGS298      | SEY6210 <i>atg4Δ::TRP1 CUP1pr-GFP-ATG8ΔR::LEU2<br/>pATG4<sup>S307D</sup>::URA3</i>                        | This study    |
| RGS306      | SEY6210 <i>atg4Δ::TRP1 CUP1pr-GFP-ATG8ΔR::LEU2<br/>pATG4::URA3</i>                                        | This study    |
| SAY084      | SEY6210 <i>atg4Δ::TRP1</i>                                                                                | This study    |
| SAY114      | SEY6210 <i>atg4Δ::TRP1 CUP1-ATG8-GFP::HIS3</i>                                                            | This study    |
| SAY130      | YTS159 <i>atg4Δ::HIS5 S.p</i>                                                                             | This study    |
| SAY144      | SEY6210 <i>atg4Δ::TRP1 pep4Δ::LEU2 ATG4-GFP::URA3</i>                                                     | This study    |
| SAY145      | SEY6210 <i>atg4Δ::TRP1 pep4Δ::LEU2 ATG4<sup>PD</sup>-GFP::URA3</i>                                        | This study    |
| SEY6210     | MATα <i>ura3-52 leu2-3,112 his3-Δ200 trp1-Δ901 lys2-801<br/>suc2-Δ mel GAL</i>                            | <sup>2</sup>  |
| YTS159      | MATα <i>his3Δ1 leu2Δ0 lys2Δ0 ura3Δ0 pho13Δ::KAN<br/>pho8::PHO8Δ60</i>                                     | <sup>3</sup>  |

**Supplementary Table 2. Fragments of the phosphopeptide containing S307**

| <b>Ion</b> | <b>Theoretical mass</b> | <b>Charge</b> | <b>Fragment</b>                 | <b>Error (ppm)</b> | <b>Observed mass</b> | <b>Intensity</b> |
|------------|-------------------------|---------------|---------------------------------|--------------------|----------------------|------------------|
| y1         | 147,1128                | 1             | y.K.                            | 1,1                | 147,112965           | 29455,555        |
| b2         | 171,1128                | 1             | .GI.a                           | 1,1                | 171,112991           | 6784,47          |
| y2         | 310,1761                | 1             | g.YK.                           | 0,4                | 310,176245           | 22795,92         |
| y3         | 367,1976                | 1             | f.GYK.                          | 0,4                | 367,19776            | 38706,972        |
| b6         | 512,294                 | 1             | .GIAGGR.p                       | 1,3                | 512,294621           | 18049,535        |
| y4         | 514,266                 | 1             | f.FGYK.                         | 1,2                | 514,266646           | 31481,249        |
| y5         | 661,3344                | 1             | y.FFGYK.                        | 1,1                | 661,335124           | 16951,494        |
| b9 -H3PO4  | 765,4002                | 1             | .GIAGGRPSS.s [1xPhospho]        | 0,8                | 765,400814           | 9385,1363        |
| y6         | 824,3978                | 1             | l.YFFGYK.                       | -3,5               | 824,394839           | 7189,8417        |
| b10 -H3PO4 | 852,4322                | 1             | .GIAGGRPSSS.l [1xPhospho]       | 2,8                | 852,434598           | 4239,2025        |
| a11 -H3PO4 | 937,5214                | 1             | .GIAGGRPSSSL.y [1xPhospho]      | 5                  | 937,526105           | 5226,2504        |
| b11 -H3PO4 | 965,5163                | 1             | .GIAGGRPSSSL.y [1xPhospho]      | 1,8                | 965,518006           | 10765,566        |
| y8         | 1024,5138               | 1             | s.SLYFFGYK.                     | 1,4                | 1024,515319          | 3141,1023        |
| b11        | 1063,4932               | 1             | .GIAGGRPSSSL.y [1xPhospho]      | 1,2                | 1063,494449          | 5405,7069        |
| y9 -H2O    | 1093,5353               | 1             | s.SSLYFFGYK.                    | 1,9                | 1093,537427          | 3142,459         |
| a12 -H3PO4 | 1100,5847               | 1             | .GIAGGRPSSSLY.f [1xPhospho]     | 0,4                | 1100,58518           | 9392,8115        |
| b12 -H3PO4 | 1128,5796               | 1             | .GIAGGRPSSSLY.f [1xPhospho]     | 1                  | 1128,580742          | 18525,648        |
| b12        | 1226,5565               | 1             | .GIAGGRPSSSLY.f [1xPhospho]     | 0,9                | 1226,557631          | 6077,6881        |
| a13 -H3PO4 | 1247,6531               | 1             | .GIAGGRPSSSLYF.f [1xPhospho]    | 0,7                | 1247,654062          | 12089,635        |
| b13 -H3PO4 | 1275,648                | 1             | .GIAGGRPSSSLYF.f [1xPhospho]    | 0,9                | 1275,649207          | 12113,115        |
| b13        | 1373,6249               | 1             | .GIAGGRPSSSLYF.f [1xPhospho]    | 2,5                | 1373,6284            | 2952,5813        |
| a14 -H3PO4 | 1394,7215               | 1             | .GIAGGRPSSSLYFF.g [1xPhospho]   | 1                  | 1394,722916          | 11252,16         |
| b14 -H3PO4 | 1422,7165               | 1             | .GIAGGRPSSSLYFF.g [1xPhospho]   | 1,6                | 1422,718782          | 7187,6221        |
| a15 -H3PO4 | 1451,743                | 1             | .GIAGGRPSSSLYFFG.y [1xPhospho]  | -0,4               | 1451,742493          | 3650,5025        |
| b15 -H3PO4 | 1479,7379               | 1             | .GIAGGRPSSSLYFFG.y [1xPhospho]  | 1,2                | 1479,739648          | 11264,852        |
| b15        | 1577,7148               | 1             | .GIAGGRPSSSLYFFG.y [1xPhospho]  | 2,3                | 1577,718519          | 1173,9552        |
| a16 -H3PO4 | 1614,8063               | 1             | .GIAGGRPSSSLYFFGY.k [1xPhospho] | 0,9                | 1614,807866          | 5342,8832        |
| b16 -H3PO4 | 1642,8013               | 1             | .GIAGGRPSSSLYFFGY.k [1xPhospho] | 0,4                | 1642,801956          | 3685,3678        |



## Supplementary References

1. James, P., Halladay, J. & Craig, E.A. Genomic libraries and a host strain designed for highly efficient two-hybrid selection in yeast. *Genetics*. **144**, 1425-1436 (1996).
2. Robinson, J.S., Klionsky, D.J., Banta, L.M. & Emr, S.D. Protein sorting in *Saccharomyces cerevisiae*: isolation of mutants defective in the delivery and processing of multiple vacuolar hydrolases. *Mol Cell Biol* **8**, 4936-4948 (1988).
3. Noda, T., Matsuura, A., Wada, Y. & Ohsumi, Y. Novel system for monitoring autophagy in the yeast *Saccharomyces cerevisiae*. *Biochem Biophys Res Commun* **210**, 126-132 (1995).
